# Supplementary material for: Chemical Structure of Trichomonas vaginalis Surface Lipoglycan: A ROLE FOR SHORT GALACTOSE (β1–4/3) N-ACETYLGLUCOSAMINE REPEATS IN HOST CELL INTERACTION
Source: PubMed Central journal article supplement — J Biol Chem. 2011 Sep 7;286(47):40494–508. doi: 10.1074/jbc.M111.280578 (PMC3220458; doi:10.1074/jbc.m111.280578), 2011-09-07
Supplement: supp_M111.280578_jbc.M111.280578-2.pdf [file supp_M111.280578_jbc.M111.280578-2.pdf]

**Figure S1:**  $^1\text{H}$  NMR spectra of TvLG (A) One-dimensional  $^1\text{H}$  NMR spectrum of the dephosphorylated TvLG fraction after exchange into  $^2\text{H}_2\text{O}$ . The  $\beta$ -GlcNAc anomeric resonances are overlapped with the water peak. Data obtained using a Bruker Avance II 500MHz spectrometer at 300K. (B) Anomeric region of the two-dimensional  $^1\text{H}$  COSY spectrum of TvLG of the  $\beta$ -N-acetylhexosaminidase and  $\beta$ -galactosidase digested dephosphorylated TvLG fraction, with assigned anomeric cross-peaks labeled. Data was acquired at 303 K on a Bruker Avance spectrometer operating at 800 MHz for  $^1\text{H}$ .

**Figure S2:** The effect of  $\alpha$ -galactosidase digestion on TvLG. Mock treated TvLG (Lane 2), TvLG digested with  $\beta$ -galactosidase and  $\beta$ -N-acetylhexosaminidase (Lane 3), TvLG digested first with  $\beta$ -galactosidase and  $\beta$ -N-acetylhexosaminidase followed by  $\alpha$ -galactosidase digestion (Lane 4), TvLG digested with  $\beta$ -galactosidase and  $\beta$ -N-acetylhexosaminidase then  $\alpha$ -galactosidase and again with  $\beta$ -galactosidase and  $\beta$ -N-acetylhexosaminidase (Lane 5), TvLG digested by  $\alpha$ -galactosidase (Lane 6), TvLG digested by  $\alpha$ -galactosidase followed by  $\beta$ -galactosidase and  $\beta$ -N-acetylhexosaminidase (Lane 7), and molecular weight marker (Lane 8) were resolved by SDS-PAGE and stained with Periodate-Schiffs reagent. Numbers on the left side of the gel indicate molecular weight in kilodaltons.
