# Supplementary figures and images for: Chemical Structure of Trichomonas vaginalis Surface Lipoglycan: A ROLE FOR SHORT GALACTOSE (β1–4/3) N-ACETYLGLUCOSAMINE REPEATS IN HOST CELL INTERACTION
Source: PubMed Central journal article supplement — J Biol Chem. 2011 Sep 7;286(47):40494–508. doi: 10.1074/jbc.M111.280578 (PMC3220458; doi:10.1074/jbc.m111.280578), 2011-09-07

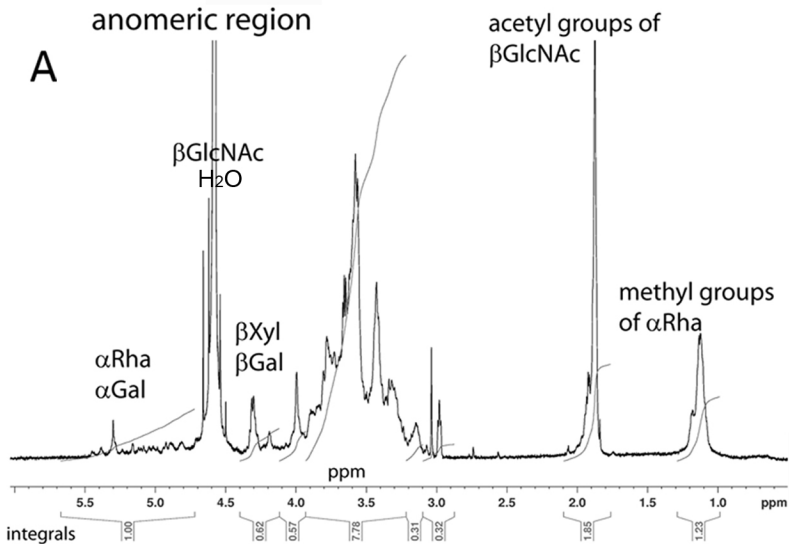

**B** COSY (anomerics)

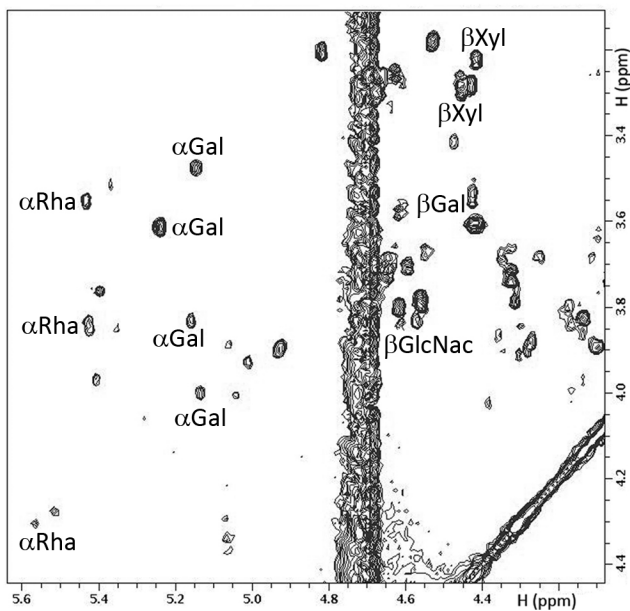

**1****2****3****4****5****6****7**

130  
95  
72  
55  
43  
34  
26  
17

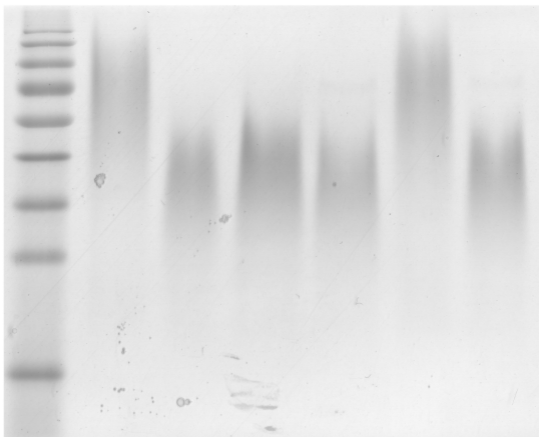

Supplement: supp_M111.280578_jbc.M111.280578-1.pdf [file supp_M111.280578_jbc.M111.280578-1.pdf]
